# Supplementary material for: Downregulation of Dickkopf-3, a Wnt antagonist elevated in Alzheimer’s disease, restores synapse integrity and memory in a disease mouse model
Source: eLife journal article supplement (doi:10.7554/elife.89453), 2023-09-25

**Figure 2 - figure supplement 3A**

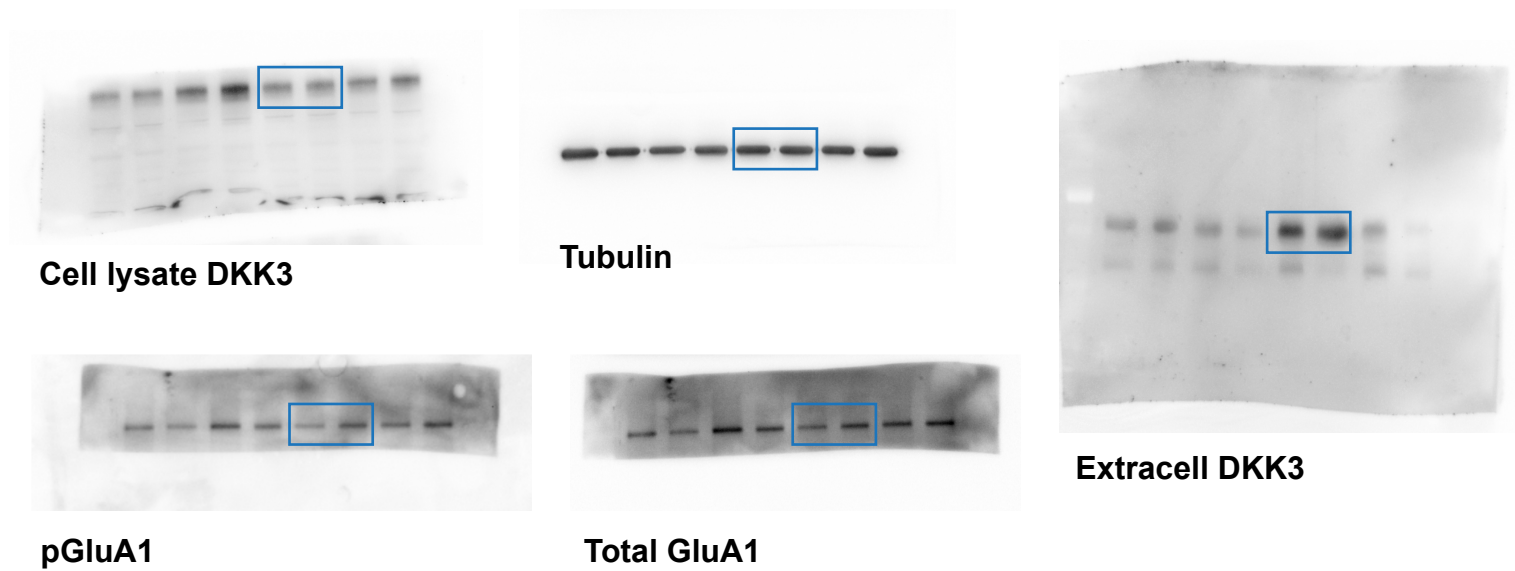

**Figure 2 - figure supplement 3B**

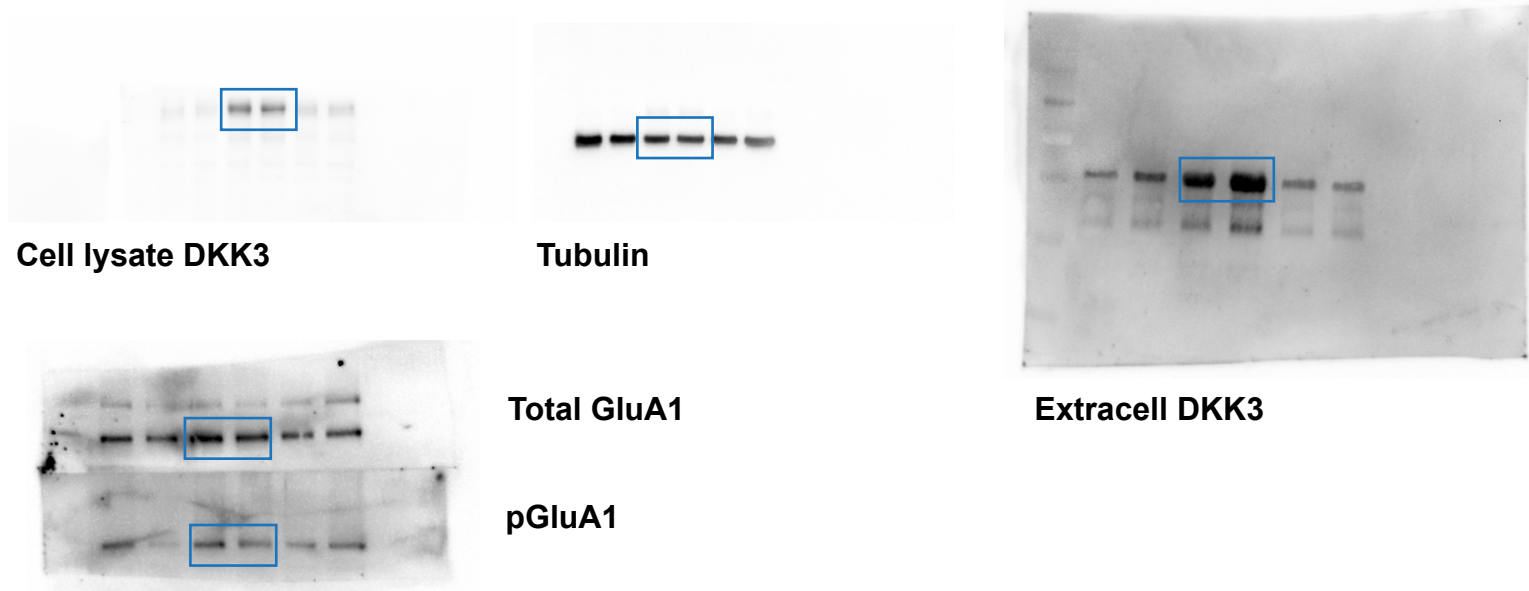

**Figure 2 - figure supplement 3C**

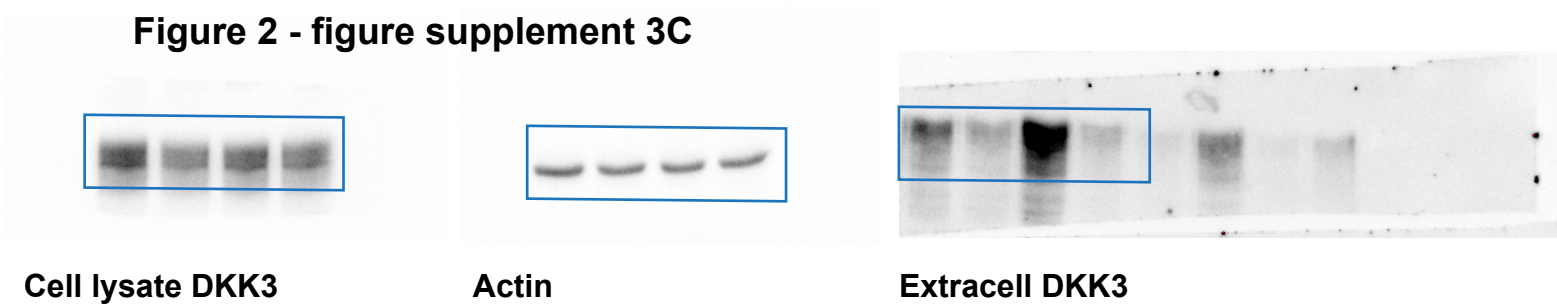

**Figure 2 - figure supplement 3D**

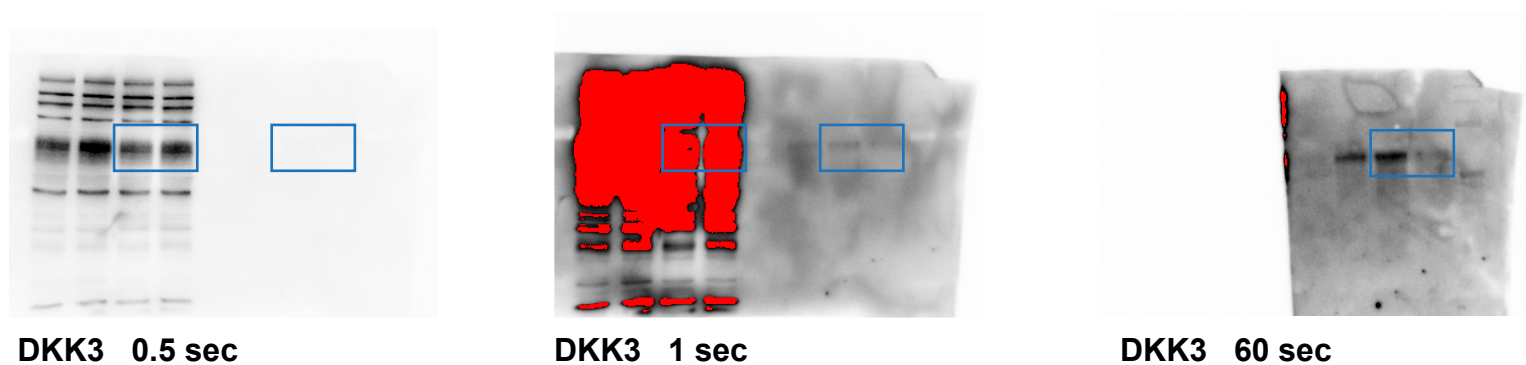

Supplement: fig2-figsupp3-data1 [file elife-89453-fig2-figsupp3-data1-v1.zip]
