# Supplementary material for: Downregulation of Dickkopf-3, a Wnt antagonist elevated in Alzheimer’s disease, restores synapse integrity and memory in a disease mouse model
Source: eLife. 2024 Jan 29;12:RP89453. doi: 10.7554/eLife.89453 (PMC10945611; doi:10.7554/eLife.89453)
Supplement: Figure 2—figure supplement 1—source data 1. — Raw and annotated WB images. The representative western blot images for Figure 2—figure supplement 1A are indicated within a blue square. [file elife-89453-fig2-figsupp1-data1.zip]

Archive with 3 entries (3 files):
- WB Figure 2 - figure supplement 1/Fig2-S1A Actin.tif
- WB Figure 2 - figure supplement 1/Fig2-S1A Dkk3.tif
- WB Figure 2 - figure supplement 1/Source data_Figure 2 - figure supplement 1.pdf
