# Supplementary figures and images for: Downregulation of Dickkopf-3, a Wnt antagonist elevated in Alzheimer’s disease, restores synapse integrity and memory in a disease mouse model
Source: eLife journal article supplement (doi:10.7554/elife.89453), 2023-09-25

**Figure 1B**

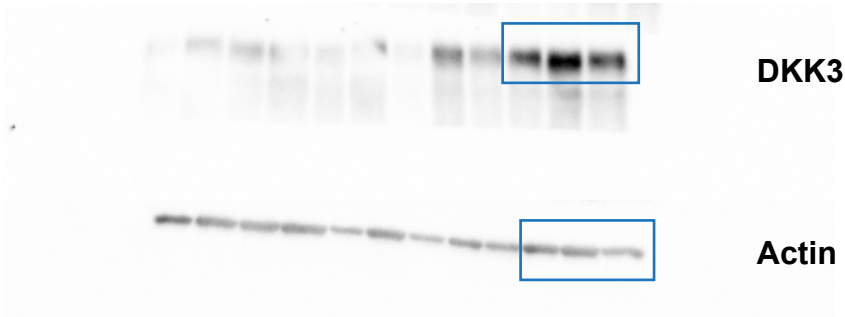

**Figure 1C**

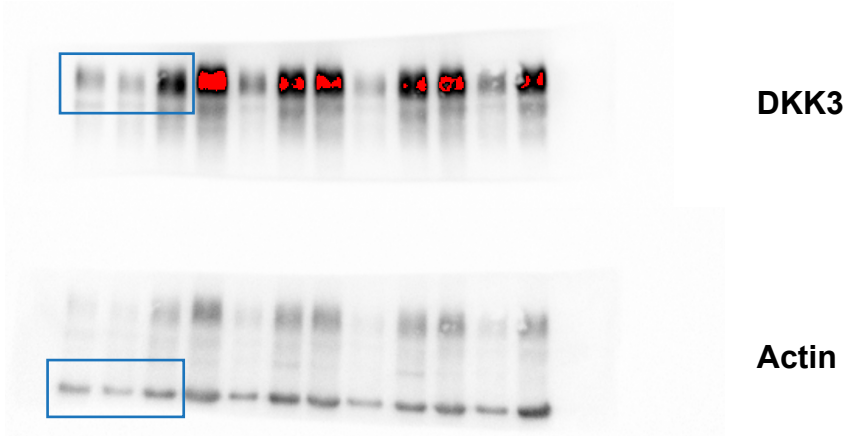

Supplement: fig1-data1 [file elife-89453-fig1-data1-v1.zip]

**Figure 2E**

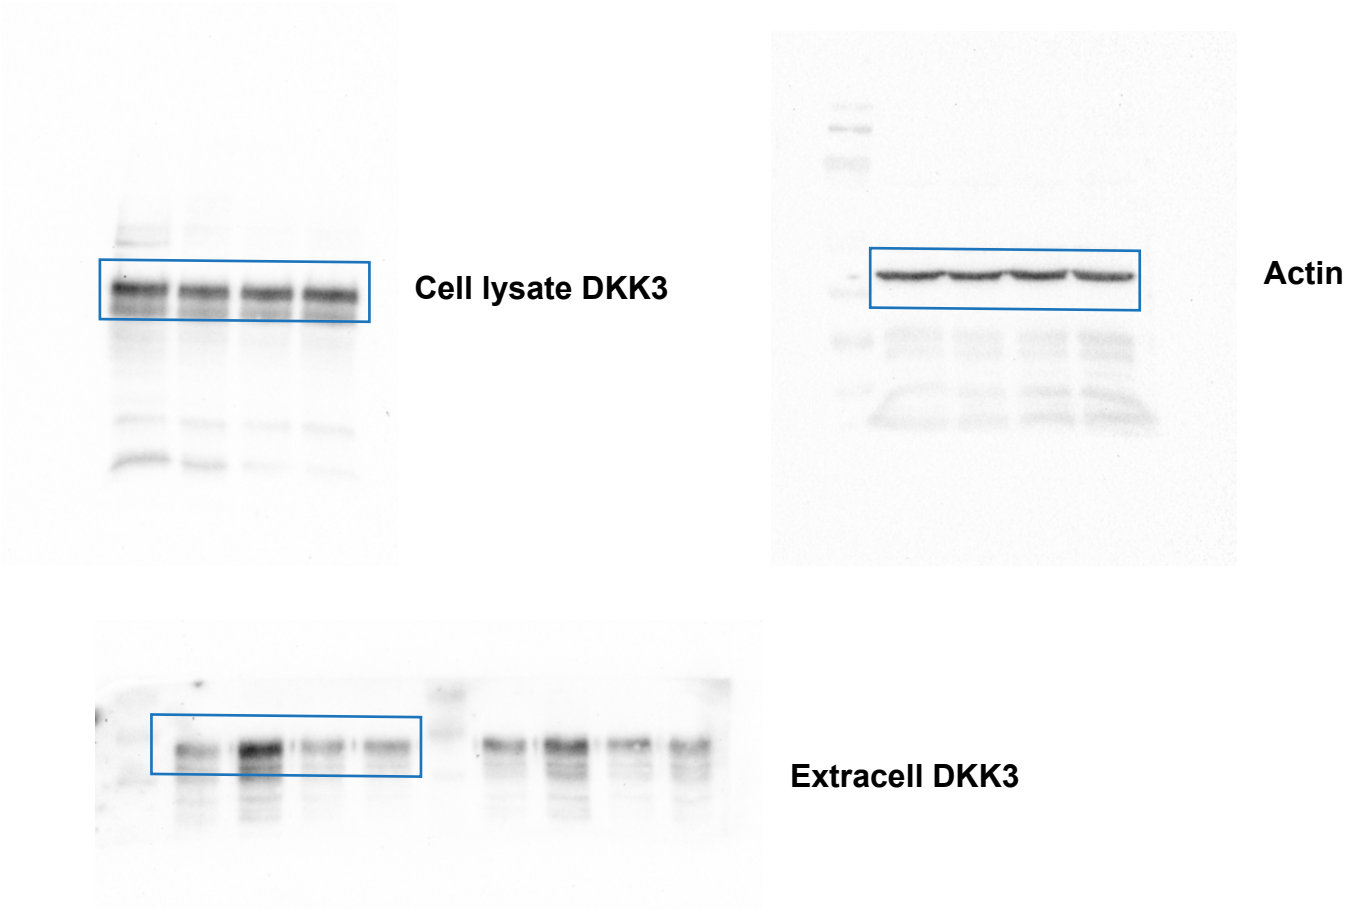

**Figure 2F**

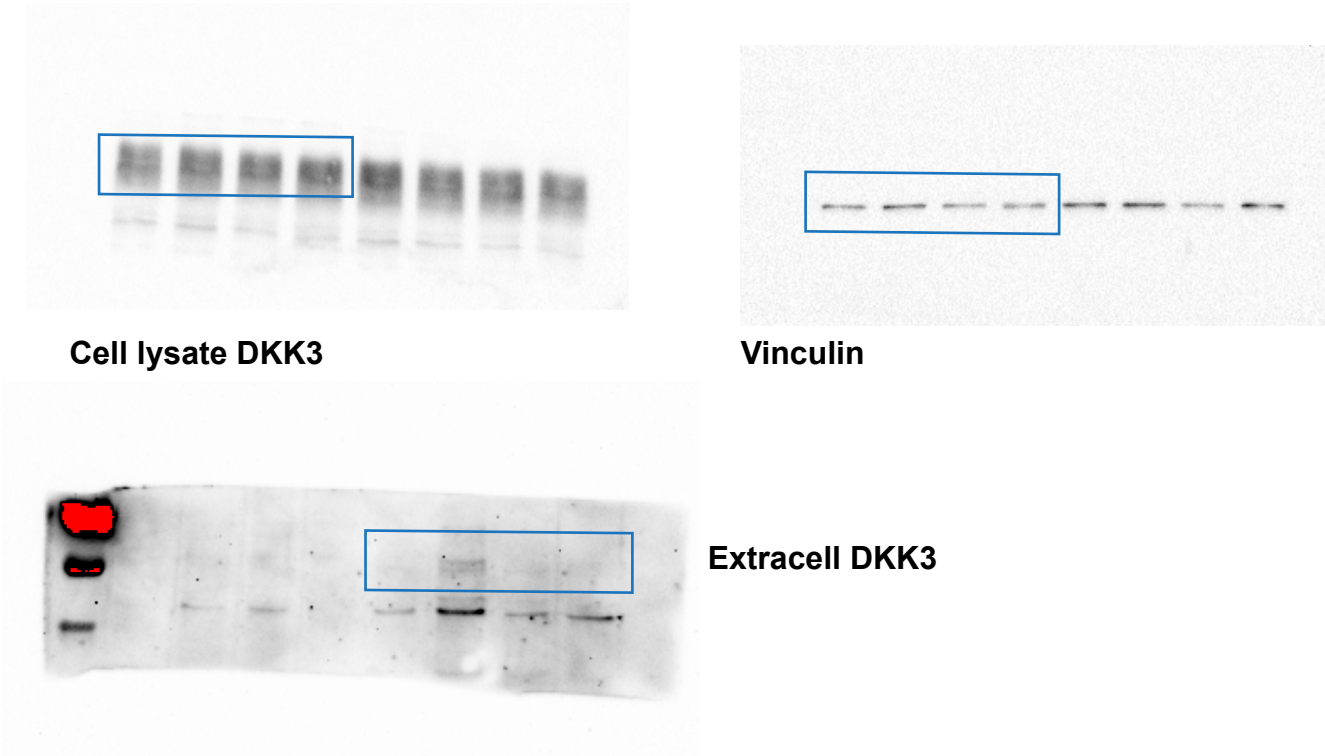

Supplement: fig2-data1 [file elife-89453-fig2-data1-v1.zip]

**Figure 2 - figure supplement 1A**

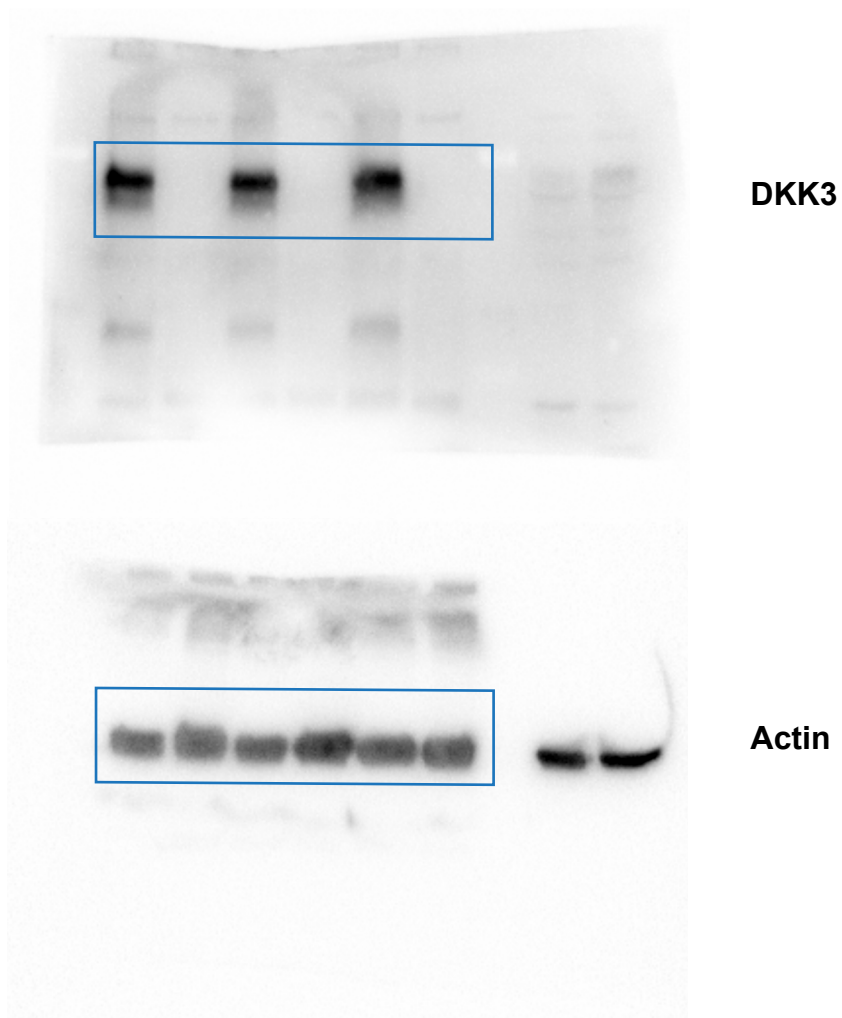

Supplement: fig2-figsupp1-data1 [file elife-89453-fig2-figsupp1-data1-v1.zip]

**Figure 2 - figure supplement 2F**

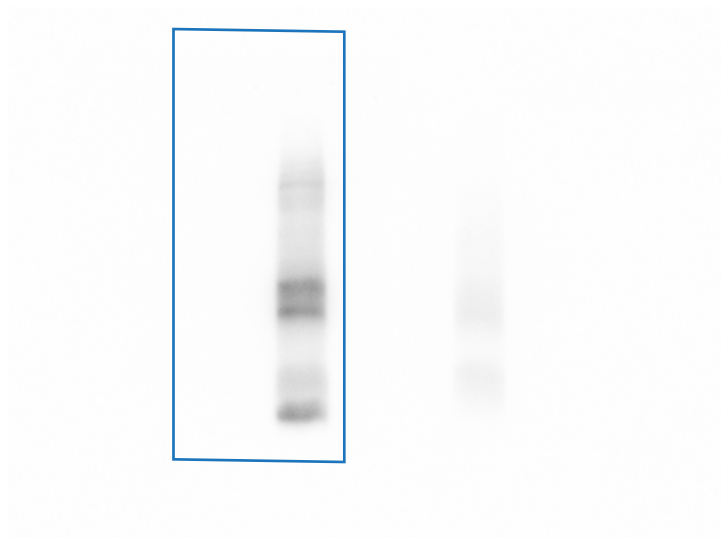

**6E10**

**Figure 2 - figure supplement 2G**

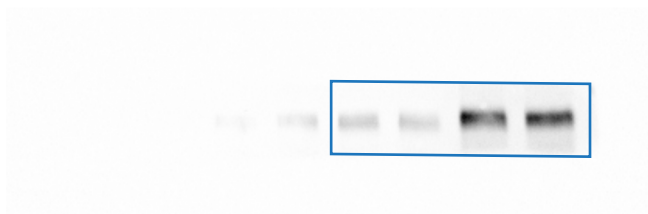

**Cell lysate DKK3**

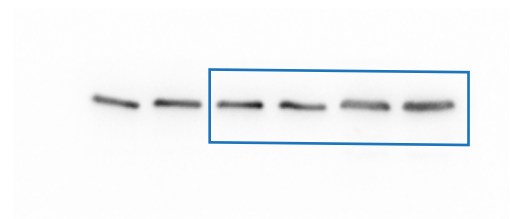

**Actin**

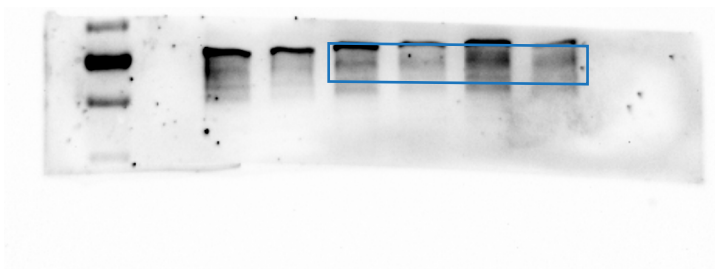

**Extracell DKK3**

Supplement: fig2-figsupp2-data1 [file elife-89453-fig2-figsupp2-data1-v1.zip]

**Figure 4E**

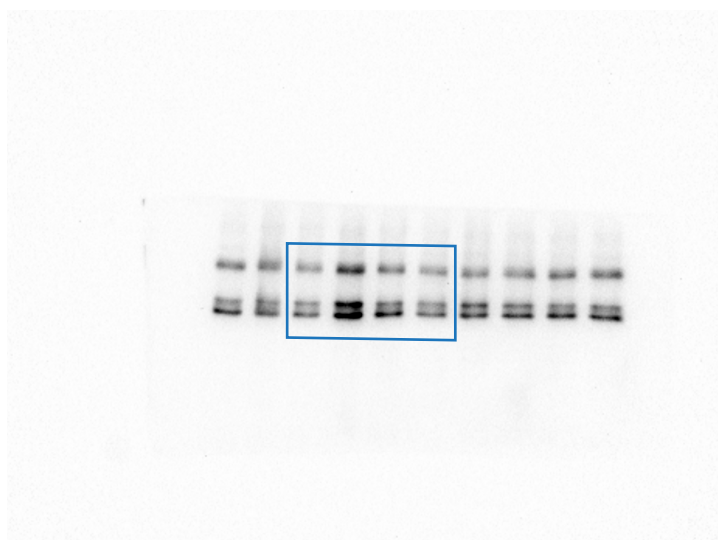

**pJnk**

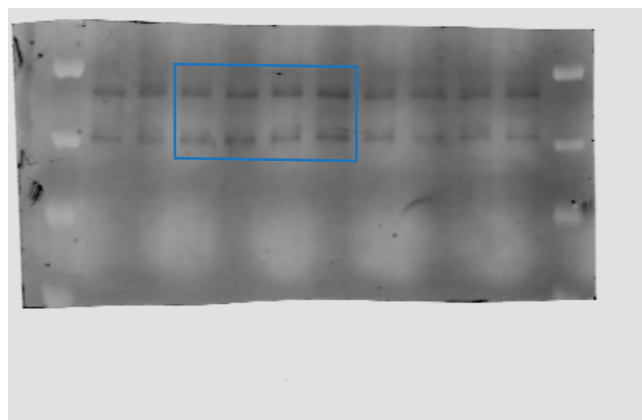

**Total Jnk**

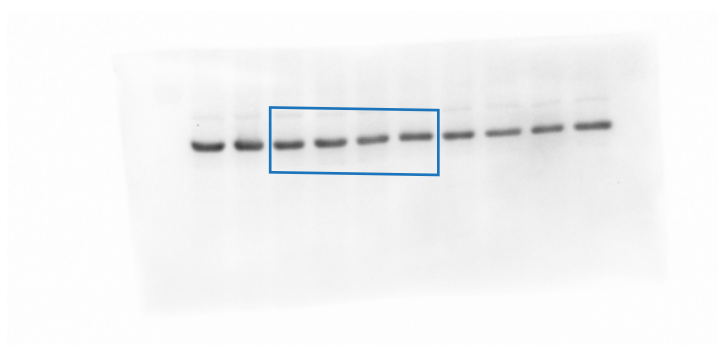

**Actin**

Supplement: fig4-data1 [file elife-89453-fig4-data1-v1.zip]
